# Supplementary figures and images for: Transferring big data across the globe
Source: Atypon-hosted journal article supplement (doi:10.1024/0301-1526/a000693), 2012-01-01

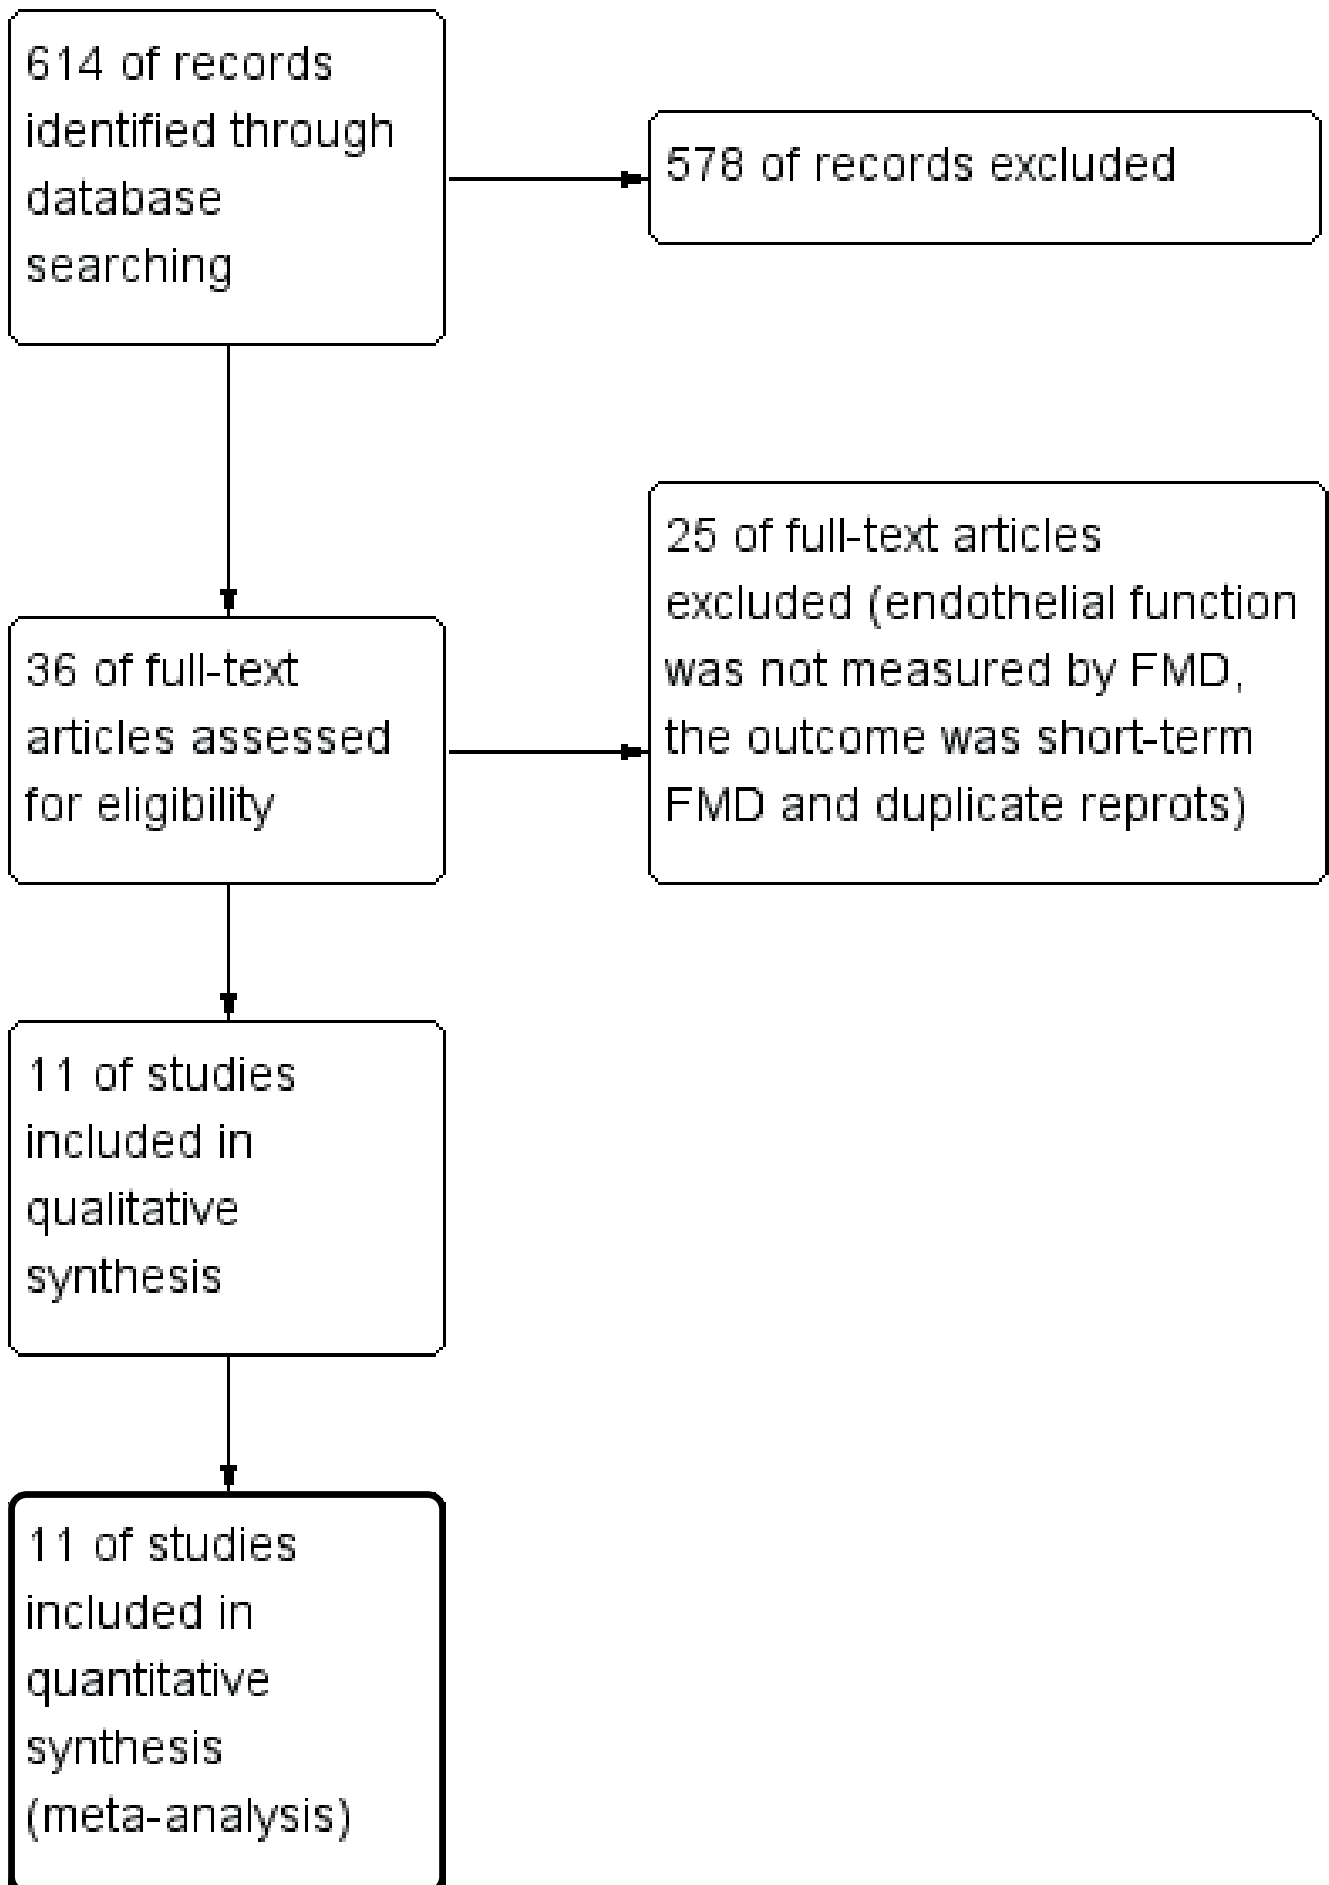

Supplement: 0301-1526_a000693_esm1.pdf [file 0301-1526_a000693_esm1.pdf]
